# Supplementary material
Source: PubMed Central journal article supplement (PMC4113509)
Supplement: NIHMS602998-supplement-Supporting_Information.pdf [file NIHMS602998-supplement-Supporting_Information.pdf]

**Supporting Information for:**

**Mechanistic analysis of the *ent*-copalyl diphosphate synthases required for gibberellin plant hormone biosynthesis leads to novel product chemistry**

Kevin Potter, Jared Criswell, Jiachen Zi, Alisha Stubbs, and Reuben J. Peters

Dept. Biochemistry, Biophysics & Molecular Biology, Iowa State University, Ames, IA 50011 USA

**Figure S1:** GC-MS based comparison of dephosphorylated AtCPS:H263A products with the pair of 8-hydroxy epimers of CPP previously reported from a tobacco species (*Nicotiana glutinosa*) cyclo-hydratase, NgCLS (ref. 3i). Also shown are the inferred direct enzymatic products, with numbering as defined in the text and **6** defined here as 8 $\beta$ -hydroxy-CPP.

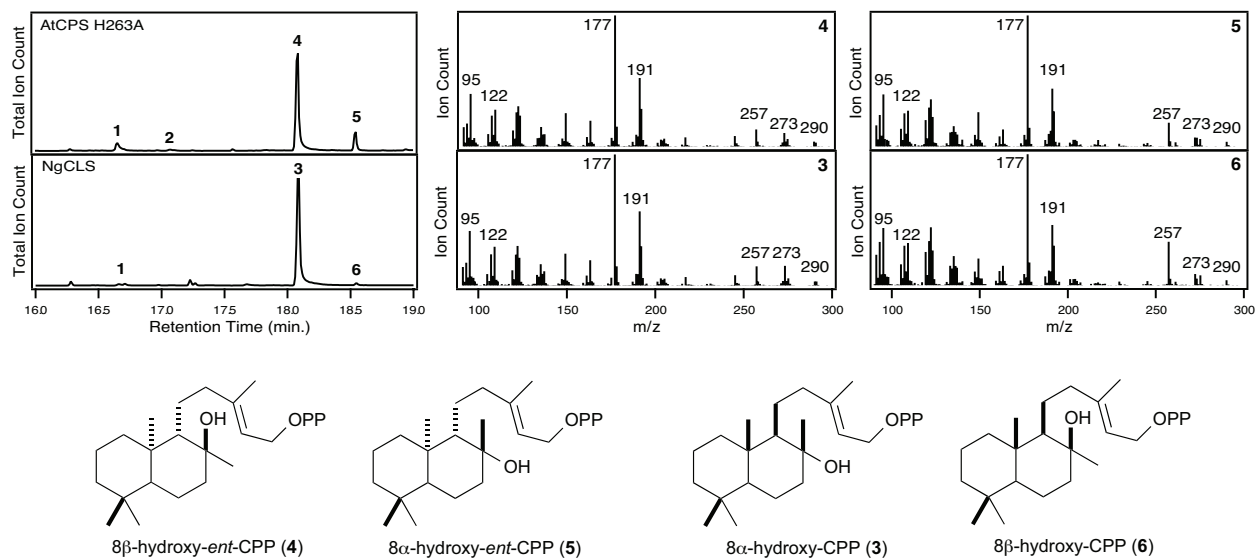

## Experimental NMR analysis

This was carried out much as previously described (ref. 3h). Briefly, to isolate sufficient amounts of *ent*-labd-13*E*-en-8 $\alpha$ ,15-diol for conformation by NMR spectral analysis, 2 x 1 L cultures were fermented, extracted twice with an equal volume of hexanes, with the phases separated in a separatory funnel, and the pool hexanes dried by rotary evaporation. The resulting extract was redissolved in 10 mL fresh hexanes and purified using a Reveleris automated flash chromatography system. The resulting fractions were analyzed by GC-MS, and that containing the targeted *ent*-labd-13*E*-en-8 $\alpha$ ,15-diol dried under N<sub>2</sub>, yielding ~1.5 mg, which was redissolved in 0.5 mL CDCl<sub>3</sub>. This sample was analyzed by NMR, using a Bruker Avance 700 spectrometer equipped with a 5-mm HCN cryogenic probe for <sup>1</sup>H and <sup>13</sup>C, one-dimensional <sup>1</sup>H acquired at 700 MHz, and one-dimensional <sup>13</sup>C acquired at 174 MHz using standard experiments from the Bruker TopSpin version 1.4 software. Chemical shifts were referenced using known chloroform (<sup>13</sup>C 77.23, <sup>1</sup>H 7.24 ppm) signals offset from TMS (Table S1), and compared to those we previously found for the enantiomer (ref. 3h).

**Table S1:** <sup>1</sup>H and <sup>13</sup>C NMR data for *ent*-labd-13*E*-en-8 $\alpha$ ,15-diol

| Position   | $\delta_{\text{H}}$               | $\delta_{\text{C}}$ |
|------------|-----------------------------------|---------------------|
| <b>1a</b>  | 1.57 (1H, m)                      | 40.3                |
| <b>1b</b>  | 0.89 (1H, dd, $J = 11.8, 3.6$ Hz) |                     |
| <b>2a</b>  | 1.51 (1H, dt, $J = 13.6, 3.6$ Hz) | 19.0                |
| <b>2b</b>  | 1.35 (1H, m)                      |                     |
| <b>3a</b>  | 1.30 (1H, m)                      | 42.6                |
| <b>3b</b>  | 1.07 (1H, dd, $J = 13.6, 3.6$ Hz) |                     |
| <b>4</b>   |                                   | 33.8                |
| <b>5</b>   | 0.84 (1H, dd, $J = 12.2, 2.0$ Hz) | 56.7                |
| <b>6a</b>  | 1.57 (1H, m)                      | 21.2                |
| <b>6b</b>  | 1.19 (1H, m)                      |                     |
| <b>7a</b>  | 1.78 (1H, br.d, $J = 12.6$ Hz)    | 45.2                |
| <b>7b</b>  | 1.30 (1H, m)                      |                     |
| <b>8</b>   |                                   | 74.7                |
| <b>9</b>   | 0.97 (1H, t, $J = 3.6$ Hz)        | 61.9                |
| <b>10</b>  |                                   |                     |
| <b>11a</b> | 1.45 (1H, m)                      | 24.2                |
| <b>11b</b> | 1.31 (1H, m)                      |                     |
| <b>12</b>  | 2.01 (2H, m)                      | 43.5                |
| <b>13</b>  |                                   | 141.7               |
| <b>14</b>  | 5.36 (1H, t, $J = 7.0$ Hz)        | 123.7               |
| <b>15</b>  | 4.07 (2H, t, $J = 7.8$ Hz)        | 60.0                |
| <b>16</b>  | 1.61 (3H, s)                      | 17.1                |
| <b>17</b>  | 1.05 (3H, s)                      | 24.5                |
| <b>18</b>  | 0.79 (3H, s)                      | 34.0                |
| <b>19</b>  | 0.70 (3H, s)                      | 22.1                |
| <b>20</b>  | 0.71 (3H, s)                      | 16.1                |

**Figure S2:**  $^1\text{H}$  1D spectrum (black) with comparison to that previously recorded for labd-13*E*-en-8 $\alpha$ ,15-diol (blue; ref. 3h).

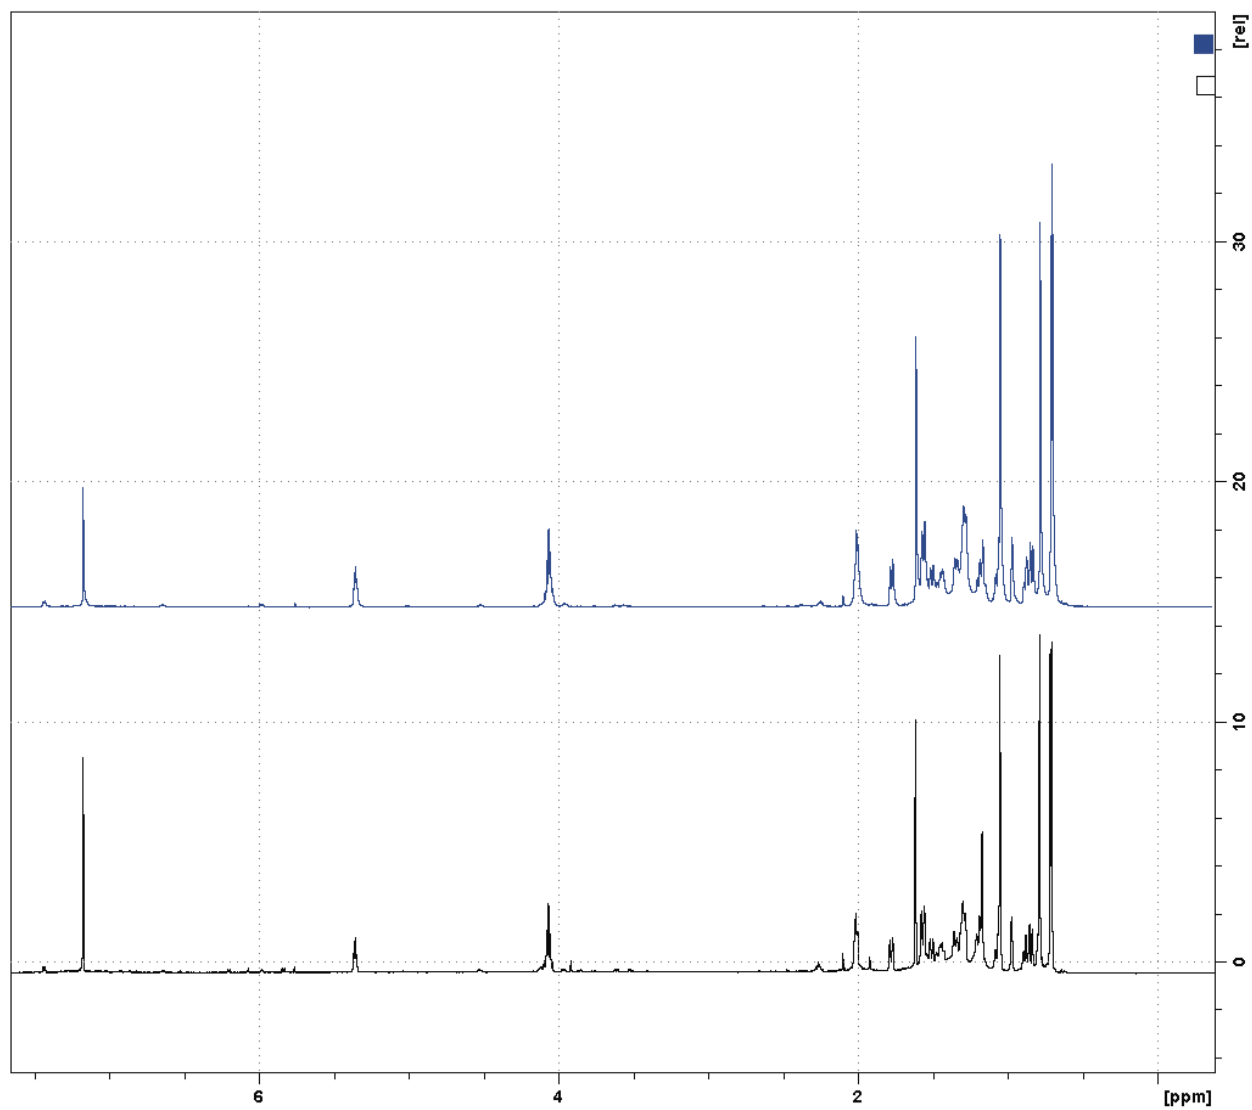

**Figure S3:**  $^{13}\text{C}$  1D spectrum (black) with comparison to that previously recorded for labd-13*E*-en-8 $\alpha$ ,15-diol (blue; ref. 3h).

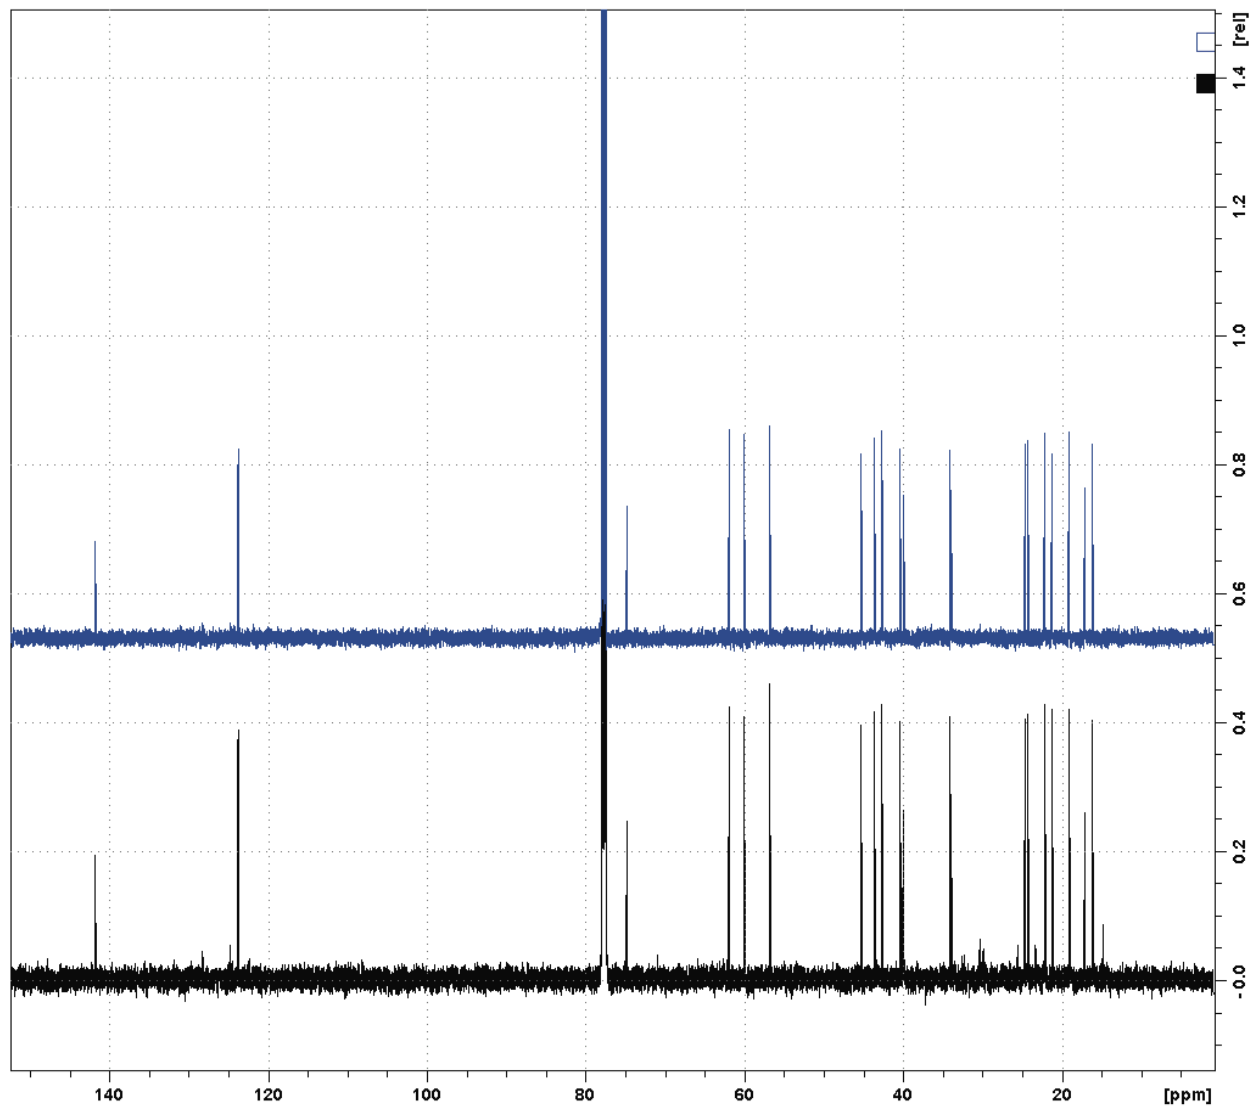

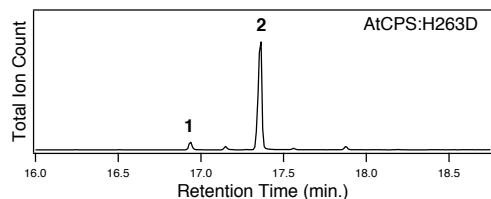

**Figure S4:** Effect of H263D mutation on AtCPS product outcome. Chromatograms from GC-MS analysis of the dephosphorylated products (numbering as in text).

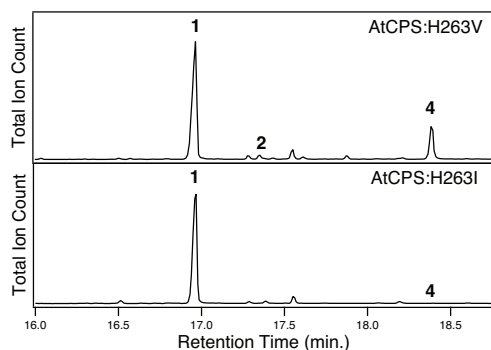

**Figure S5:** Effect of larger aliphatic residue substitutions for AtCPS:H263. Chromatograms from GC-MS analysis of the dephosphorylated products (numbering as in text).

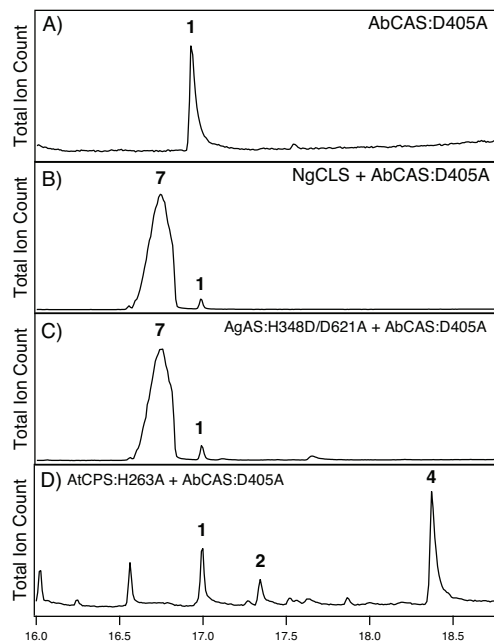

**Figure S6:** AtCPS:H263A produces *enantiomeric* 8-hydroxy-CPP. Chromatograms from GC-MS analysis of extracts from dephosphorylated products from reactions with the indicated enzyme(s). A) Mutation of “middle” aspartate from the DxDD motif knocks-out class II diterpene cyclase/hydratase activity of *Abies balsamea cis*-abienol synthase (AbCAS:D405A). B) Production of 8 $\alpha$ -hydroxy-CPP (**3**) by NgCLS enables AbCAS:D405A to produce *cis*-abienol (**7**). C) Similarly, AgAS:H348D/D621A also produces **3**, leading to the production of **7** by AbCAS:D405A. D) AtCPS:H263A mutant products (e.g., **4**) are not further reacted upon by AbCAS:D405A, demonstrating a clear difference in stereochemistry.
